# Supplementary material for: The ERA5-Land soil temperature bias in permafrost regions
Source: Copernicus journal article supplement (doi:10.5194/tc-14-2581-2020), 2020-08-12
Supplement: Supplementary file 1 [file tc-14-2581-2020-supplement.zip]

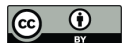

## *Supplement of*

# **The ERA5-Land soil temperature bias in permafrost regions**

**Bin Cao et al.**

*Correspondence to:* Xin Li ([xinli@itpcas.ac.cn](mailto:xinli@itpcas.ac.cn)) and Donghai Zheng ([zhengd@itpcas.ac.cn](mailto:zhengd@itpcas.ac.cn))

- tc-14-2581-2020-supplement-title-page.pdf
- Supplement
  - .DS\_Store
  - ERA5LandDownload.py
  - ObservationMeta.xlsx
- \_\_MACOSX
  - Supplement
    - \* .\_DS\_Store
    - \* .\_ERA5LandDownload.py
    - \* .\_ObservationMeta.xlsx

The copyright of individual parts of the supplement might differ from the CC BY 4.0 License.
